# Supplementary material
Source: publisher site journal article supplement (https://www.dovepress.com/article/409544)
Supplement: Supplementary file 1 [file get_supplementary_file.php]

Table S1 Metadata of global distributed ST43 *Klebsiella michiganensis* strains deposited in the NCBI GenBank database.

| Strain | Cluster | Source | Country | Year | WGS accession | BioProject Accession | BioSample Accession | Assembly Level |
| --- | --- | --- | --- | --- | --- | --- | --- | --- |
| XP-B1 | 2 | Soil sample | China | 2014 | LFZL00000000.1 | PRJNA289043 | SAMN03840808 | Contig |
| AS012469 | 2 | Homo sapiens | USA | 2015 | VLMB00000000.1 | PRJNA553678 | SAMN12250788 | Scaffold |
| CVUAS9732.2 | 2 | Cattle | Germany | 2014 | NNBG00000000.1 | PRJNA393153 | SAMN07319192 | Contig |
| 707021-17 | 2 | Homo sapiens | Switzerland | 2017 | VNUE00000000.1 | PRJNA543274 | SAMN12212270 | Scaffold |
| 6202 | 2 | Homo sapiens | Switzerland | 2017 | VNSR00000000.1 | PRJNA543274 | SAMN12212077 | Contig |
| 502790-17 | 2 | Homo sapiens | Switzerland | 2017 | VNRC00000000.1 | PRJNA543274 | SAMN12212214 | Contig |
| 401153-17 | 2 | Homo sapiens | Switzerland | 2017 | VNOX00000000.1 | PRJNA543274 | SAMN12212157 | Contig |
| FUJ80139 | 3 | Homo sapiens | Japan | 2019 | DAFBLZ00000000.1 | PRJNA514245 | SAMN21893131 | Contig |
| FUJ80140 | 3 | Homo sapiens | Japan | 2019 | DAFBMA00000000.1 | PRJNA514245 | SAMN21893132 | Contig |
| FUJ80179 | 3 | Homo sapiens | Japan | 2018 | DAFBMF00000000.1 | PRJNA514245 | SAMN21893156 | Contig |
| FUJ80138 | 3 | Homo sapiens | Japan | 2019 | DAFBMK00000000.1 | PRJNA514245 | SAMN21893130 | Contig |
| FUJ80185 | 2 | Homo sapiens | Japan | 2019 | DAFBNN00000000.1 | PRJNA514245 | SAMN21893161 | Contig |
| FUJ80164 | 3 | Homo sapiens | Japan | 2018 | DAFBMP00000000.1 | PRJNA514245 | SAMN21893149 | Contig |
| FUJ80205 | 3 | Homo sapiens | Japan | 2019 | DAFBOA00000000.1 | PRJNA514245 | SAMN21893170 | Contig |
| Kox7 | 2 | Homo sapiens | Australia | 2018 | DAFINA00000000.1 | PRJNA514245 | SAMN23286088 | Contig |
| Kox74 | 2 | Homo sapiens | Australia | 2018 | DAFINN00000000.1 | PRJNA514245 | SAMN23286104 | Contig |
| Kox33 | 2 | Homo sapiens | Australia | 2018 | DAFINZ00000000.1 | PRJNA514245 | SAMN23286087 | Contig |
| Kox59 | 2 | Homo sapiens | Australia | 2018 | DAFIOY00000000.1 | PRJNA514245 | SAMN23286119 | Contig |
| 15090013 | 2 | Serpentes | Switzerland | 2015 | JAPJJF00000000.1 | PRJNA894995 | SAMN31484524 | Contig |
| 7507.77 | 2 | Homo sapiens | Switzerland | 2019 | JAPJJI00000000.1 | PRJNA894995 | SAMN31484521 | Contig |
| 2563 | 1 | Homo sapiens | China | 2018 | CP116214 | PRJNA923778 | SAMN32737190 | Complete |
| SCKM090631 | 1 | Sink | China | 2019 | JAAQTX00000000.1 | PRJNA353728 | SAMN14379871 | Contig |
| SCKM090630 | 1 | Sink | China | 2019 | JAAQTY00000000.1 | PRJNA353728 | SAMN14379870 | Contig |
| KLO00029 | 2 | Homo sapiens | USA | 2018 | JADRUH00000000.1 | PRJNA475751 | SAMN12220378 | Contig |
| KLO00016 | 4 | Homo sapiens | USA | 2018 | JADRUK00000000.1 | PRJNA475751 | SAMN10435692 | Scaffold |
| KLO00015 | 4 | Homo sapiens | USA | 2018 | JADRUL00000000.1 | PRJNA475751 | SAMN10435691 | Contig |
| KLEB014 | 2 | Homo sapiens | Australia | 2019 | JAERPV00000000.1 | PRJNA690982 | SAMN17319806 | Contig |
| 12084 | 1 | Homo sapiens | China | 2013 | CP072119 | PRJNA716129 | SAMN18395722 | Complete |
